# Supplementary material for: Multivariate Prognostic Model for Predicting the Outcome of Critically Ill Patients Using the Aromatic Metabolites Detected by Gas Chromatography-Mass Spectrometry
Source: MDPI journal article supplement (doi:10.3390/molecules27154784), 2022-07-26
Supplement: s1 [file s1]

# Multivariate Prognostic Model for Predicting the Outcome of Critically Ill Patients Using the Aromatic Metabolites Detected by Gas Chromatography-Mass Spectrometry

Alisa K. Pautova <sup>1,\*</sup>, Andrey S. Samokhin <sup>2</sup>, Natalia V. Beloborodova <sup>1</sup> and Alexander I. Revelsky <sup>2</sup>

<sup>1</sup> Negovsky Research Institute of General Reanimatology, Federal Research and Clinical Center of Intensive Care Medicine and Rehabilitology, 25-2 Petrovka Str., 107031 Moscow, Russia; nvbeloborodova@yandex.ru

<sup>2</sup> Chemistry Department, Lomonosov Moscow State University, GSP-1, Leninskie gory 1-3, 119991 Moscow, Russia; andrey.s.samokhin@gmail.com (A.S.S.), sorbent@yandex.ru (A.I.R.)

\* Correspondence: alicepau@mail.ru; Tel.: +7-905-773-8981

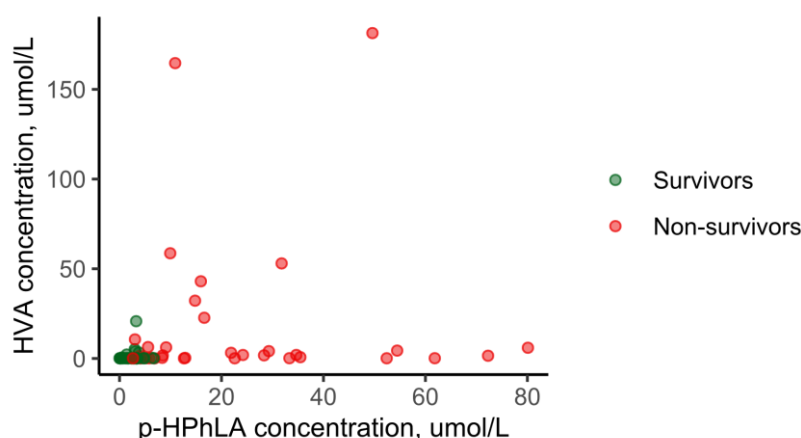

**Figure S1.** The concentration ( $\mu\text{mol/L}$ ) of homovanillic (HVA) and 4-(3-hydroxyphenyl)lactic acids (*p*-HPhLA) in the blood serum of survivors ( $n = 44$ ) and non-survivors ( $n = 35$ ). Concentrations higher than  $36 \mu\text{mol/L}$  are approximate because they were calculated by extrapolation.

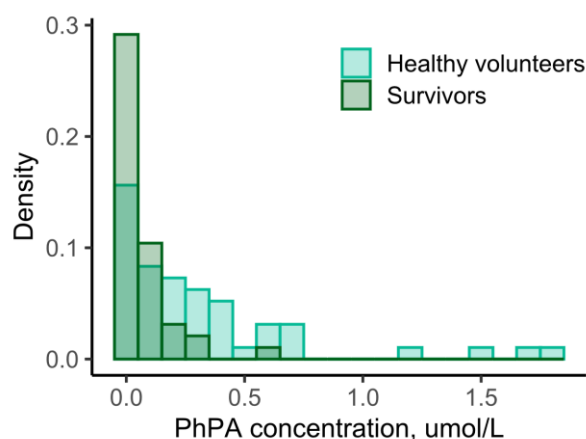

**Figure S2.** The distributions of phenylpropionic acid (PhPA) concentration,  $\mu\text{mol/L}$ , obtained for healthy volunteers ( $n = 52$ ) and survivors ( $n = 44$ ).

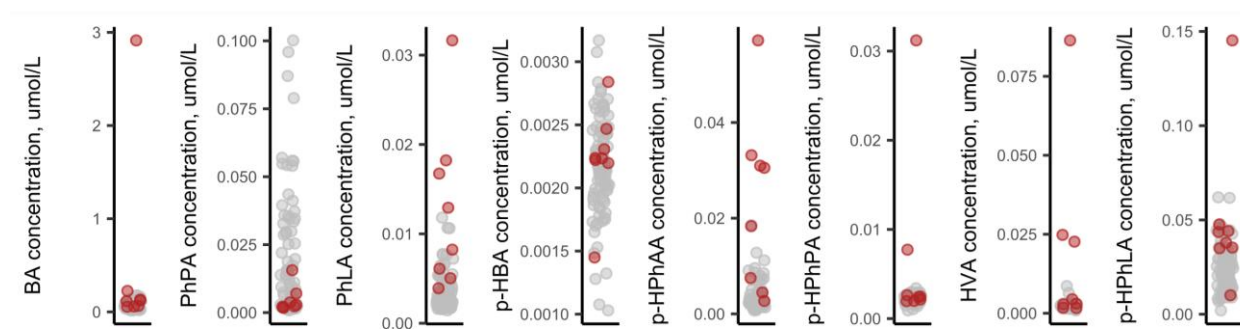

**Figure S3:** The concentration of all metabolites in the blood serum of survivors. Each person is represented by a single point. Eight samples (red points) are outliers. Points are scattered along the x-axis to improve perception in the case of overlapping. BA – benzoic acid; PhPA – 3-phenylpropionic acid; PhLA – 3-phenyllactic acid; *p*-HBA – 4-hydroxybenzoic acid; *p*-HPhAA – 2-(4-hydroxyphenyl)acetic acid; *p*-HPhPA – 4-(3-hydroxyphenyl)propionic acid; HVA – homovanillic acid; *p*-HPhLA – 4-(3-hydroxyphenyl)lactic acid.
